# Supplementary material
Source: PubMed Central journal article supplement (PMC3646583)
Supplement: NIHMS440904-supplement-01.pdf [file NIHMS440904-supplement-01.pdf]

## Supplementary information for

### ***RAB7L1* interacts with *LRRK2* to modify intraneuronal protein sorting and Parkinson's disease risk**

**Authors:** David A. MacLeod<sup>1\*</sup>, Herve Rhinn<sup>1\*</sup>, Tomoki Kuwahara<sup>1\*</sup>, Ari Zolin<sup>1</sup>, Gilbert Di Paolo<sup>1</sup>, Brian D. MacCabe<sup>1</sup>, Lorraine N. Clark<sup>1</sup>, Scott A. Small<sup>1</sup>, and Asa Abeliovich<sup>1#</sup>

#### **Affiliations:**

<sup>1</sup>Departments of Pathology, Cell Biology and Neurology, and Taub Institute, Columbia University, Black Building 1208, 650 West 168th Street, New York, NY, 10032, USA

<sup>#</sup>To whom correspondence should be addressed. E-mail: aa900@columbia.edu

\*These authors contributed equally.

This pdf files includes:

-Supplementary Experimental Procedures

-Supplementary References

-Figures S1, S2, S3, S4, S5 and S6, related respectively to Figures 1, 2, 3, 4, 5, 7

- Tables S1, S3, S4, S5, S6. Tables S1 and S3 related to Figures 1, Table S4 to Figure 4, Table S5 to Figure 7 and Table S6 to Figure 5.

Table S2, related to Figure 1 is provided as an independent Excel file ("Table S2.xls", 78kb)
